# Supplementary material for: HIV Controllers Exhibit Effective CD8+ T Cell Recognition of HIV-1-Infected Non-activated CD4+ T Cells
Source: PubMed Central journal article supplement (PMC6449512; doi:10.1016/j.celrep.2019.03.016), 2019-04-02
Supplement: mmc1.pdf [file mmc1.pdf]

**Cell Reports, Volume 27**

**Supplemental Information**

**HIV Controllers Exhibit Effective CD8<sup>+</sup>**

**T Cell Recognition of HIV-1-Infected**

**Non-activated CD4<sup>+</sup> T Cells**

**Blandine Monel, Annmarie McKeon, Pedro Lamothe-Molina, Priya Jani, Julie Boucau, Yovana Pacheco, R. Brad Jones, Sylvie Le Gall, and Bruce D. Walker**

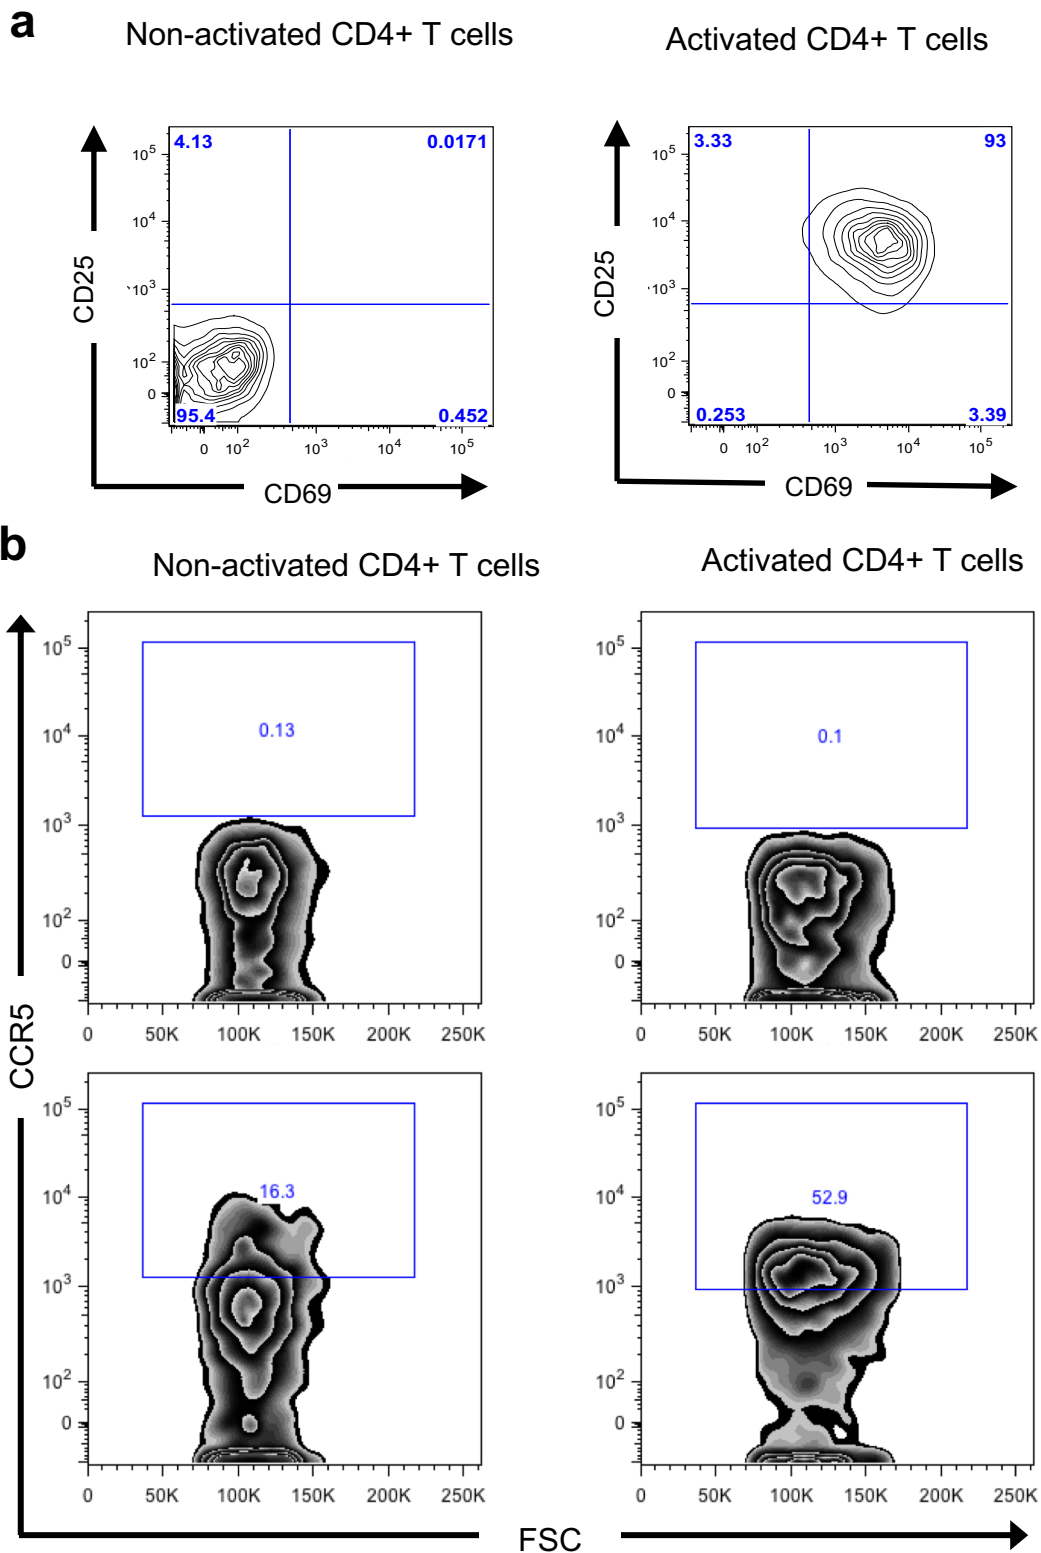

**Figure S1. Characterization of primary non-activated and activated CD4+ T cells, related to Figure 1.** (a) Primary non-activated CD4+ T cells were identified by the absence of CD25+/CD69+ expression on CD4+ T cells, whereas in vitro stimulation with anti-CD3 and anti-CD28 lead to expression of both markers. (b) The frequency of primary CCR5+ CD4+ T cells was measured by flow cytometry before (left panel) or after 2 days of activation with CD3/CD28 beads (right panel) and compared to isotype controls (upper panel).

**a**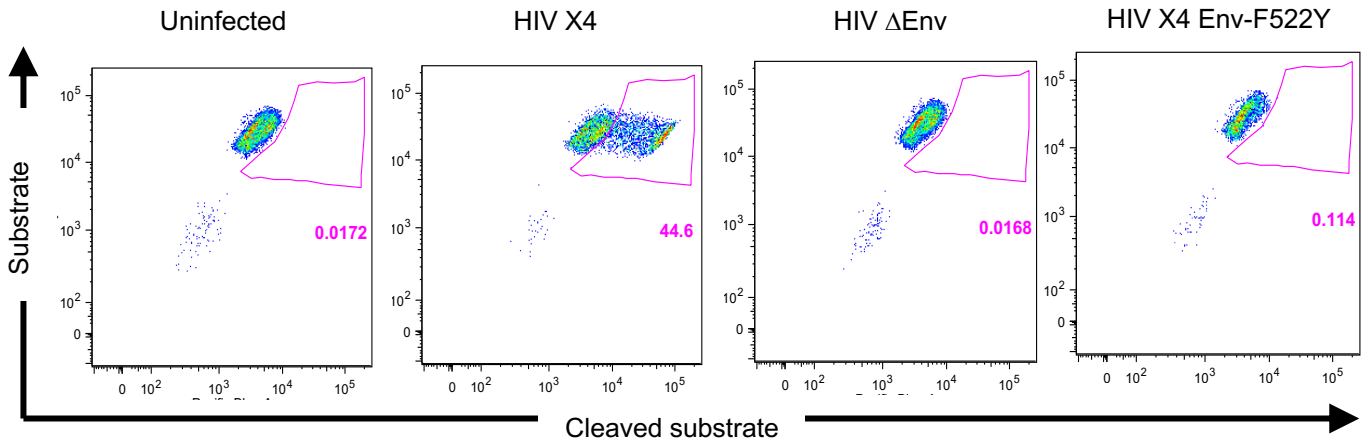**b**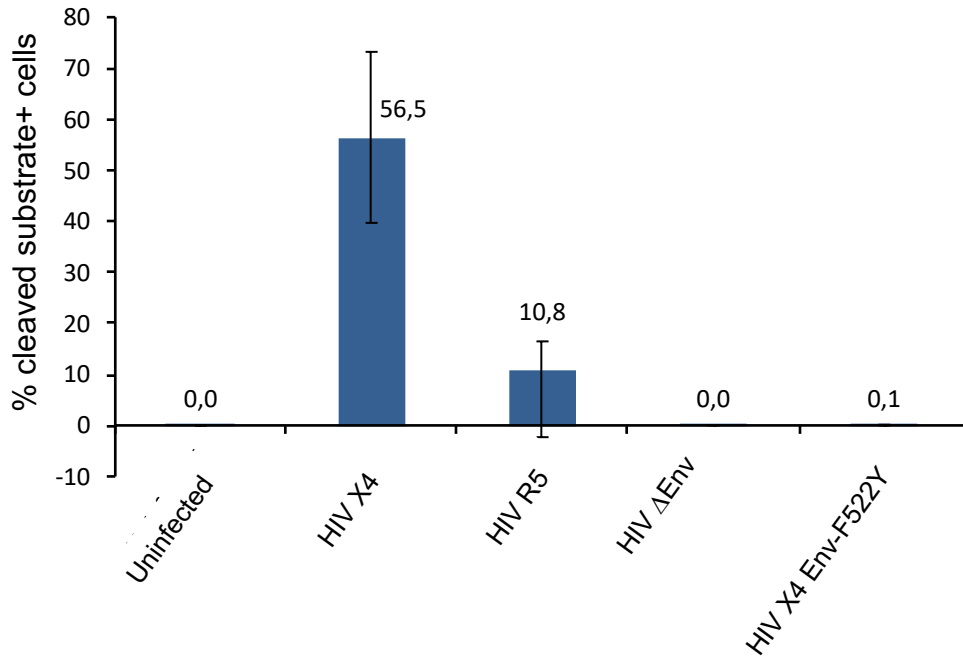

**Figure S2. HIV infection in primary non-activated CD4<sup>+</sup> T cells, related to Figure 1.** Non-activated CD4<sup>+</sup> T cells were infected for 2 hours with NL4.3 X4 (HIV X4), a virus missing the envelope (HIV ΔEnv) or a fusion defective virus (HIV X4 Env-F522Y) all carrying the fusion protein Vpr-β lactamase and an IRES-GFP cassette. HIV entry was determined 2 hours later by incubation with a FRET β-lactamase substrate, where cleaved substrate<sup>+</sup> cells represent HIV<sup>+</sup> cells. A representative experiment is shown (a) and the results from three independent experiments with cells coming from three different HIV Controllers patients are shown as mean ± standard deviation (b).

**a**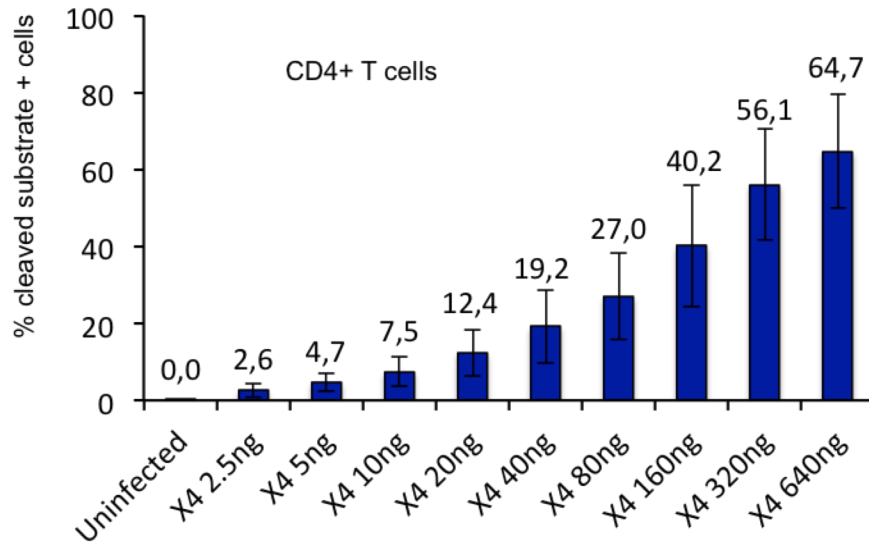**b**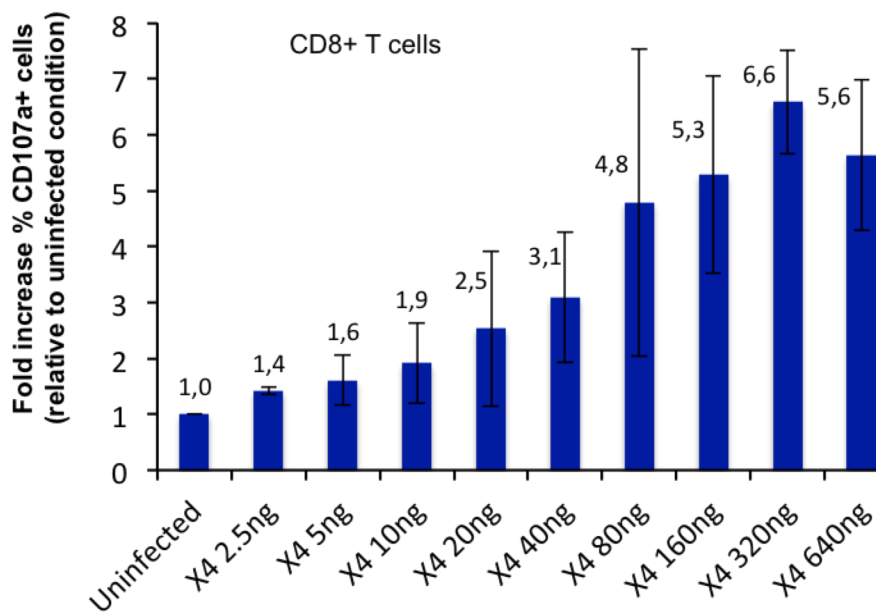

**Figure S3. Viral doses experiment, related to Figure 2.** Non-activated CD4+ T cells were infected for 2 hours with different amount of HIV X4 (as quantified by p24 ELISA) and a Vpr- $\beta$ lam assay was performed **(a)**. The CD8+ T cell response was then quantified 5 hours later by measuring CD107a expression **(b)**. The results are shown as means  $\pm$  standard deviations for three independent experiments from three different individuals.

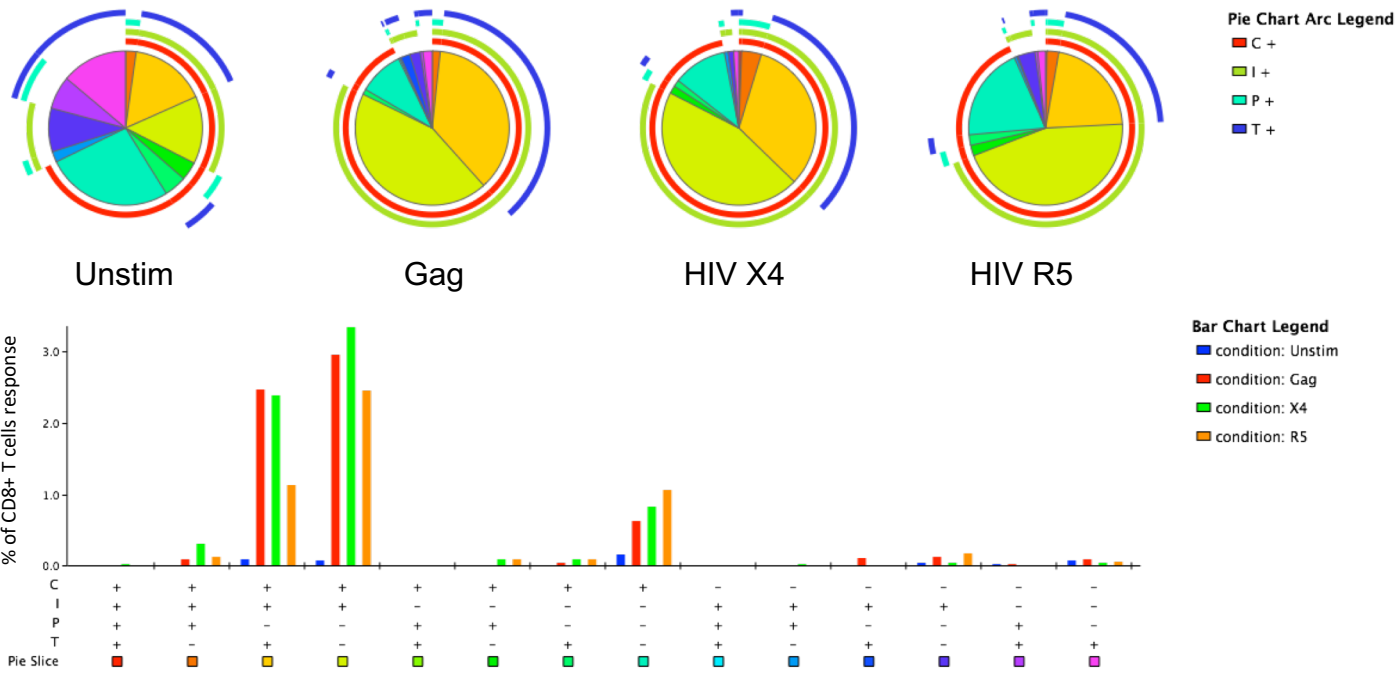

**Figure S4. Polyfunctionality profile of the CD8+ T cells response to HIV+ autologous non-activated CD4+ T cells versus Gag peptides loaded CD4+ T cells targets, related to Figure 2.** Activation of CD8+ T cells was measured by intracellular cytokine staining (IFN-g, Perforin, TNF-a) in addition to CD107a staining and by flow cytometry. The polyfunctionality profile was created with Spice software.

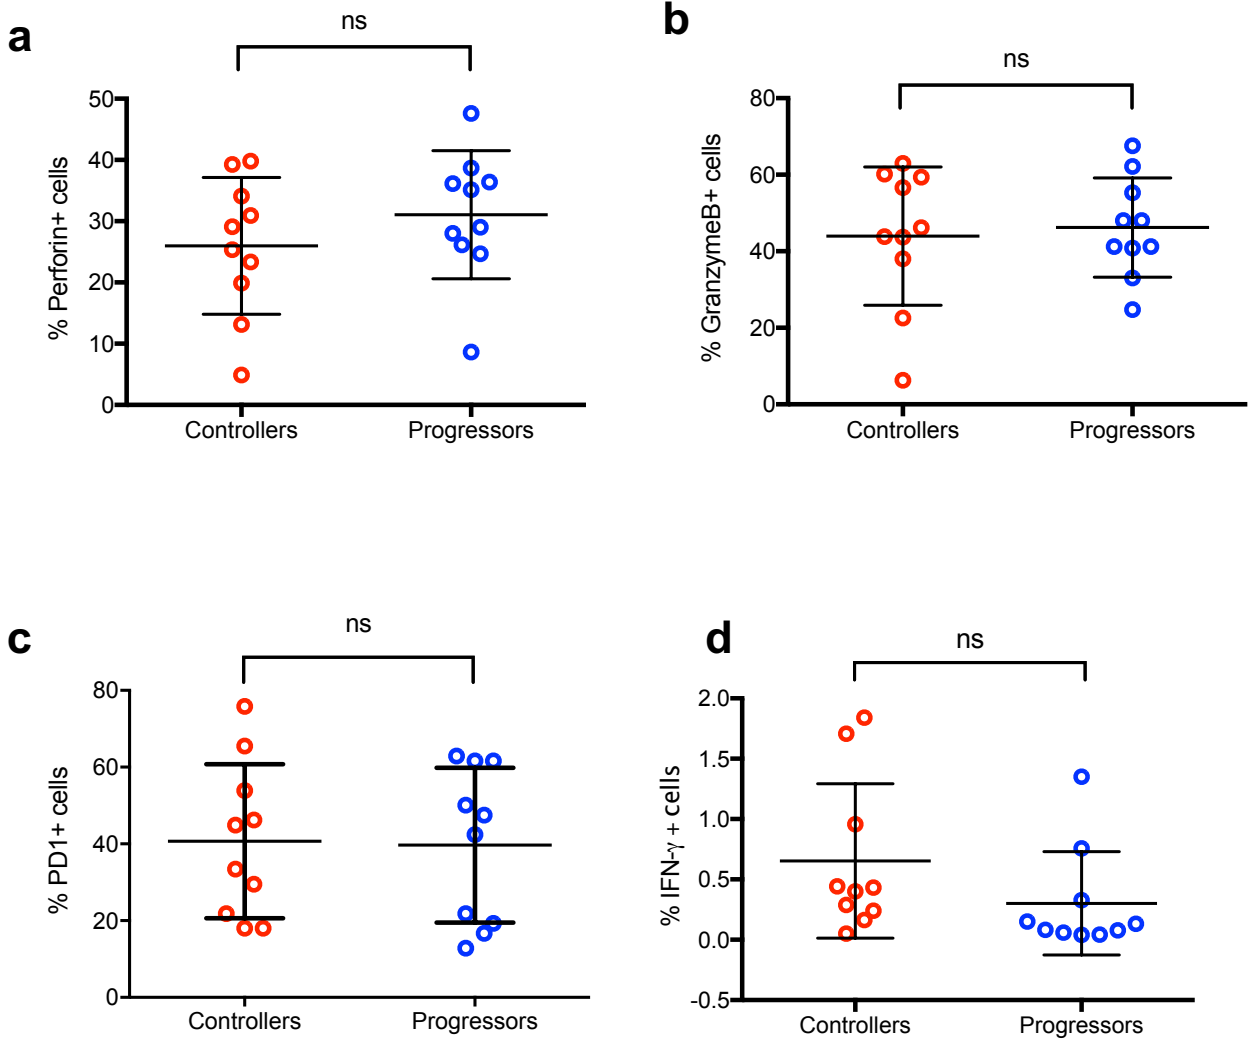

**Figure S5. Characterization of CD8+ T cells from HIV Controllers versus Progressors, related to Figure 6.** (a) Perforin expression. (b) Granzyme B expression. (c) PD1 expression. (d) CD8+ T cell response to Gag pool peptides stimulation.

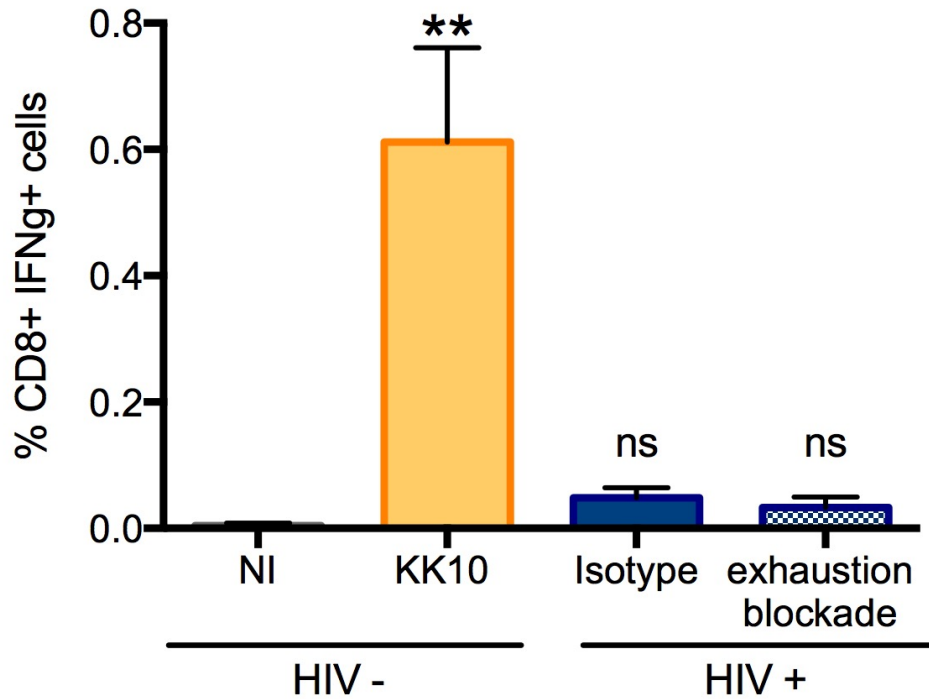

**Figure S6. Characterization of CD8+ T cells response from HIV Progressors with an exhaustion marker blockade, related to Figure 6.** CD8+ T cell response in 3 HIV Progressors was analyzed by intracellular staining of IFN- $\gamma$  and flow cytometry after stimulation with KK10 peptide or HIV infection in presence or not of blocking peptides to exhaustion markers (PDL-1, TIM3 and 2B4). Means  $\pm$  standard deviations and statistics were calculated with ANOVA multiple comparison test relative to Non-infected condition (NI) condition \*\*  $p < 0.01$ .
